# Supplementary material for: Mir-21 Suppression Promotes Mouse Hepatocarcinogenesis
Source: MDPI journal article supplement (doi:10.3390/cancers13194983), 2021-10-04
Supplement: s1 [file s1]

# Mir-21 Suppression Promotes Mouse Hepatocarcinogenesis

Marta Correia de Sousa, Nicolas Calo, Cyril Sobolewski, Monika Gjorgjieva, Sophie Clément, Christine Maeder, Dobrochna Dolicka, Margot Fournier, Laurent Vinet, Xavier Montet, Jean-François Dufour, Bostjan Humar, Francesco Negro, Christine Sempoux and Michelangelo Foti.

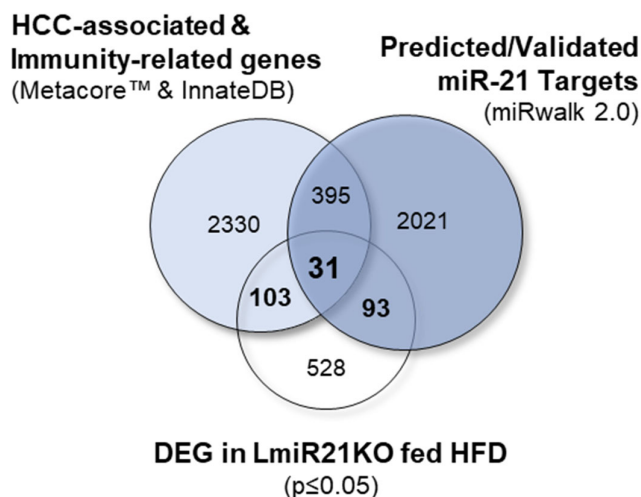

(A)

|                      | Gene           | log2FC | FC   | P-value |
|----------------------|----------------|--------|------|---------|
| Down-regulated genes | <b>Bdnf</b>    | -1.65  | 0.32 | 0.0183  |
|                      | <b>Ppp1r1b</b> | -1.45  | 0.37 | 0.0007  |
|                      | <b>Hspb1</b>   | -1.31  | 0.40 | 0.0001  |
|                      | <b>Ptp4a1</b>  | -1.14  | 0.45 | 0.0072  |
|                      | <b>Lpin1</b>   | -1.05  | 0.48 | 0.0156  |
|                      | Per2           | -1.03  | 0.49 | 0.0007  |
|                      | Cd47           | -0.69  | 0.62 | 0.0252  |
|                      | Hpgd           | -0.69  | 0.62 | 0.0165  |
|                      | Tns1           | -0.61  | 0.65 | 0.0283  |
| Up-regulated genes   | C8a            | 0.64   | 1.56 | 0.0387  |
|                      | Pml            | 0.71   | 1.63 | 0.0228  |
|                      | Selp           | 0.71   | 1.64 | 0.0424  |
|                      | Pdcd4          | 0.73   | 1.66 | 0.0101  |
|                      | <b>Mtor</b>    | 0.81   | 1.75 | 0.0044  |
|                      | <b>Il6st</b>   | 0.86   | 1.81 | 0.0062  |
|                      | <b>Appl1</b>   | 0.87   | 1.83 | 0.0126  |
|                      | Cpd            | 0.87   | 1.83 | 0.0348  |
|                      | Irak2          | 0.88   | 1.85 | 0.0049  |
|                      | Marveld2       | 0.89   | 1.85 | 0.0086  |
|                      | Col4a1         | 0.89   | 1.85 | 0.0072  |
|                      | Nek6           | 0.96   | 1.94 | 0.0218  |
|                      | <b>Cdc25a</b>  | 0.99   | 1.98 | 0.0124  |
|                      | Cxcl9          | 1.03   | 2.05 | 0.0403  |
|                      | <b>Lifr</b>    | 1.04   | 2.06 | 0.0002  |
|                      | <b>Camkk2</b>  | 1.07   | 2.10 | 0.0074  |
|                      | <b>Ngfr</b>    | 1.19   | 2.28 | 0.0379  |
|                      | <b>Ccnd1</b>   | 1.30   | 2.47 | 0.0209  |
|                      | <b>Sftpa1</b>  | 1.37   | 2.58 | 0.0140  |
|                      | <b>Egfr</b>    | 1.37   | 2.59 | 0.0141  |
|                      | <b>Tnfsf10</b> | 1.46   | 2.75 | 0.0013  |
|                      | <b>Cxcl10</b>  | 1.98   | 3.95 | 0.0034  |

(B)

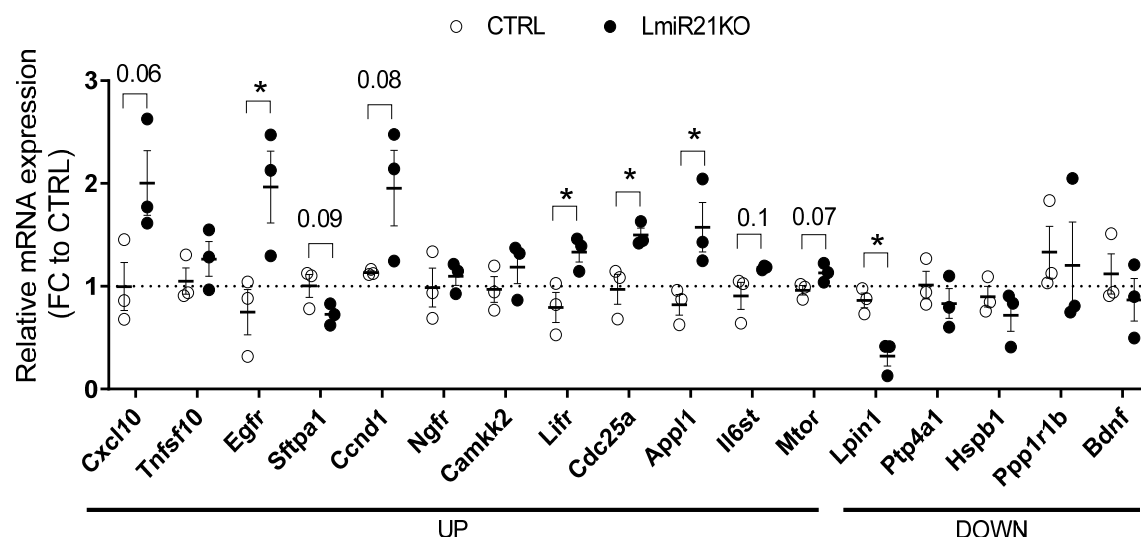

(C)

**Figure S1.** RT-qPCR validation of miR-21 targets potentially contributing to hepatocarcinogenesis. (A) List of deregulated genes (DEG) (RNAseq analysis) in hepatic tissues of LmiR21KO livers as compared to CTRL mice (see also Figure 1). DEG were cross-referenced with a list of genes associated with hepatocellular carcinoma (HCC), immunity and predicted/validated targets of miR-21-5p/-3p extracted from commercial/public databases (Metacore™ and InnateDB) and miRwalk 2.0, respectively. 31 potential candidates were identified with this approach. (B) Relative expression of the 31 candidates in the RNA-seq analysis of explanted liver tissues LmiR21KO mice fed an obesogenic diet for 3 weeks (n=3 per group). Fold-change (FC) to Control group and corresponding p-value is indicated. Upregulated genes are represented in green and downregulated genes are represented in pink. (C) RT-qPCR validation analysis of 16/31 potential candidates (genes in bold in B) in the same hepatic tissues where RNA-seq analysis was performed. Unpaired t-test with Welch's correction was used for comparison between two groups. \* p-value <0.05, \*\* p-value < 0.01, \*\*\* p-value < 0.001, \*\*\*\* p-value <0.0001.

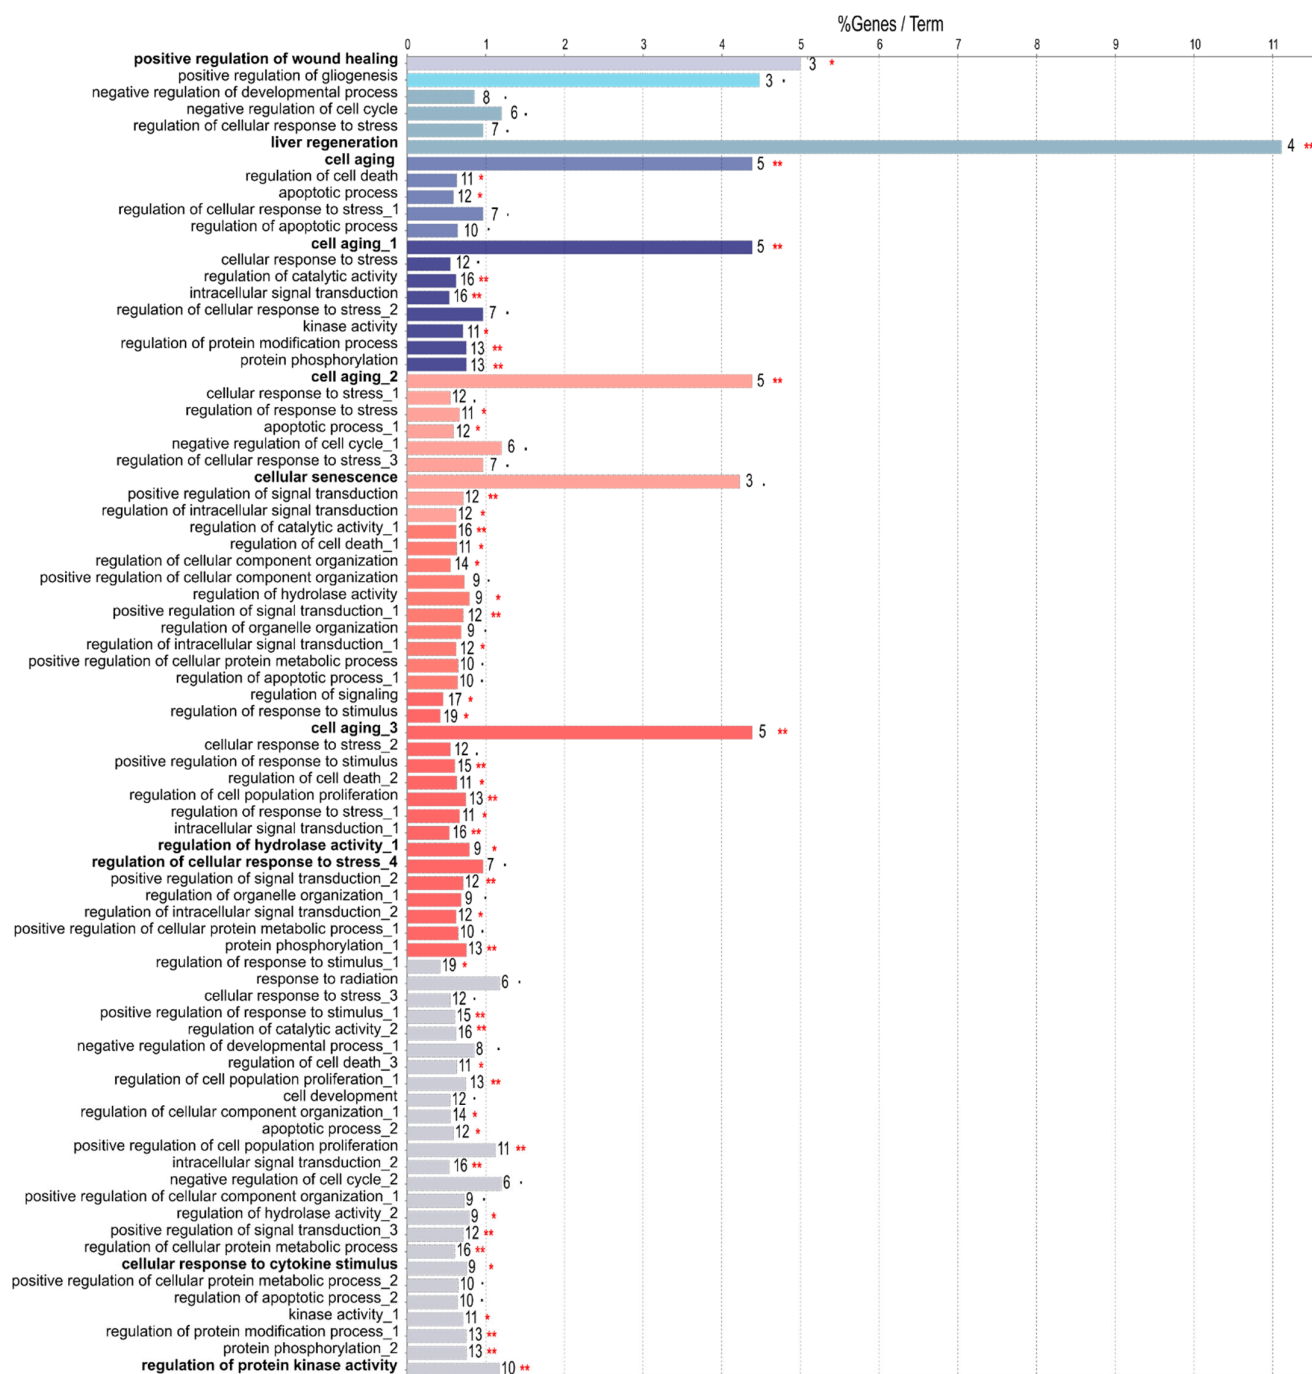

**Figure S2. MiR-21 targets upregulated under stress conditions are involved in cancer-related biological processes.** ClueGO+CluePedia (Cytoscape) analysis of deregulated genes (upregulated DEGs) potentially targeted by miR-21 (illustrated in Figure 1C) highlights functionally grouped network of biological processes (clusters of terms) with putative interactions between them, based on their kappa score level (0.45). Each cluster of terms is represented by a specific color. The number of genes (from input) involved in a specific term, as well as the term's enrichment significance within the cluster (adjusted p-value ≤ 0.10), are indicated in the graph. Two-sided hypergeometric test with Bonferroni step down correction was used to calculate enrichment significance. \* p-value < 0.05, \*\* p-value < 0.01, \*\*\* p-value < 0.001, \*\*\*\* p-value < 0.0001.

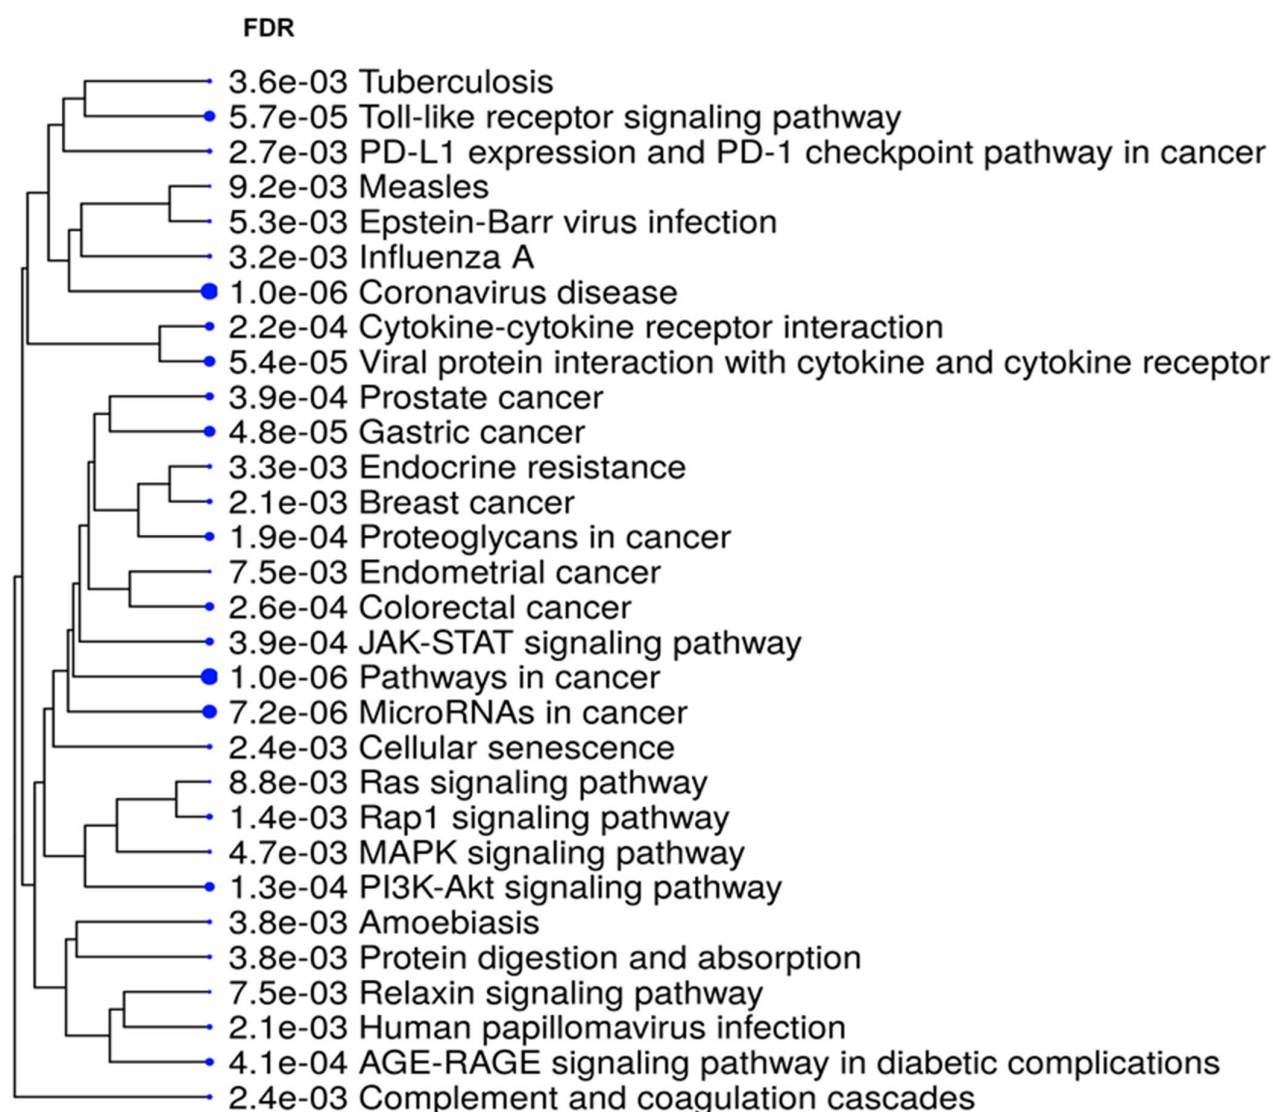

**Figure S3.** Gene Ontology enrichment analysis of potential miR-21 targets upregulated under stress conditions. Gene Ontology (GO) enrichment analysis based on Kyoto Encyclopedia of Genes and Genomes (KEGG) pathways was performed on upregulated genes identified in the transcriptome of LmiR21KO challenged with high-fat diet (illustrated in Figure 1C-E). Pathways with False Discovery Rate (FDR) < 5% are represented.



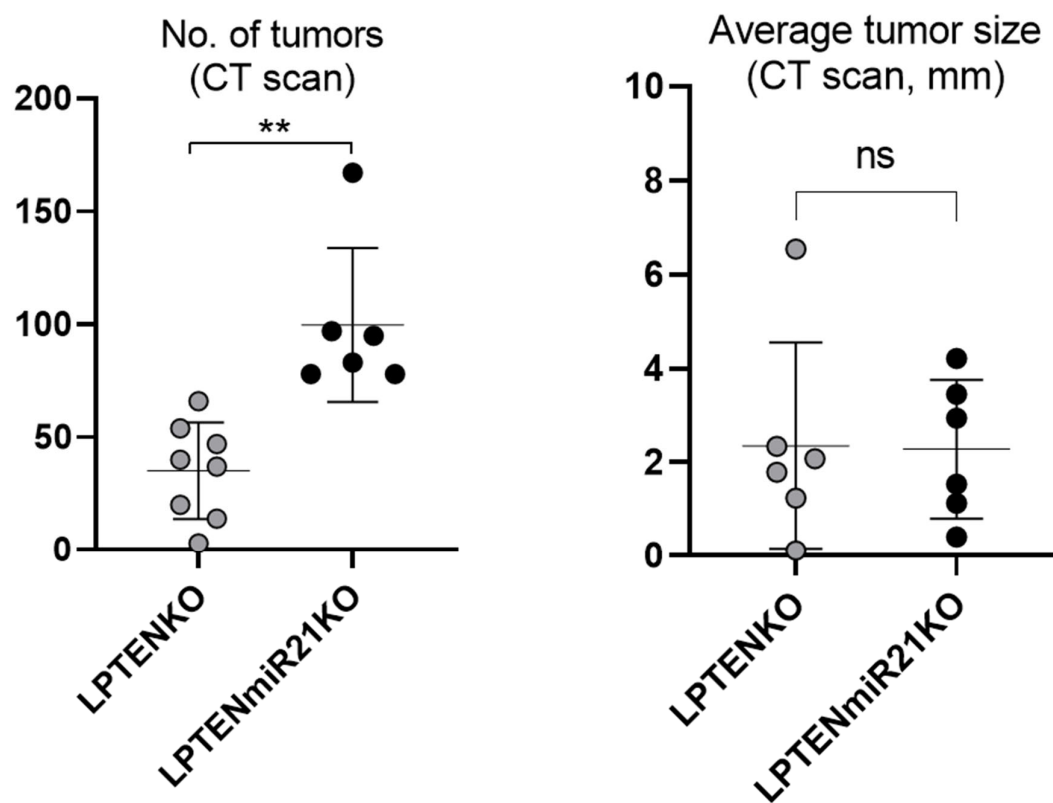

**Figure S4.** CT-scan analyses of tumoral nodules in hepatocyte-specific PTEN and PTEN/miR-21 knockout mice. **(A)** Number and **(B)** average tumor size of individual tumors per mouse identified and calculated by CT scan imaging of one-year old LPTENKO (n=6-8) and LPTENmiR21KO (n=6) mice. Data is analyzed via the OsiriX software and represented as mean ± SD. Outliers test was performed using ROUT method (Q=1%). Unpaired t-test with Welch's correction was used for comparison between two groups. \* p-value <0.05, \*\* p-value < 0.01, \*\*\* p-value < 0.001, \*\*\*\* p-value <0.0001.

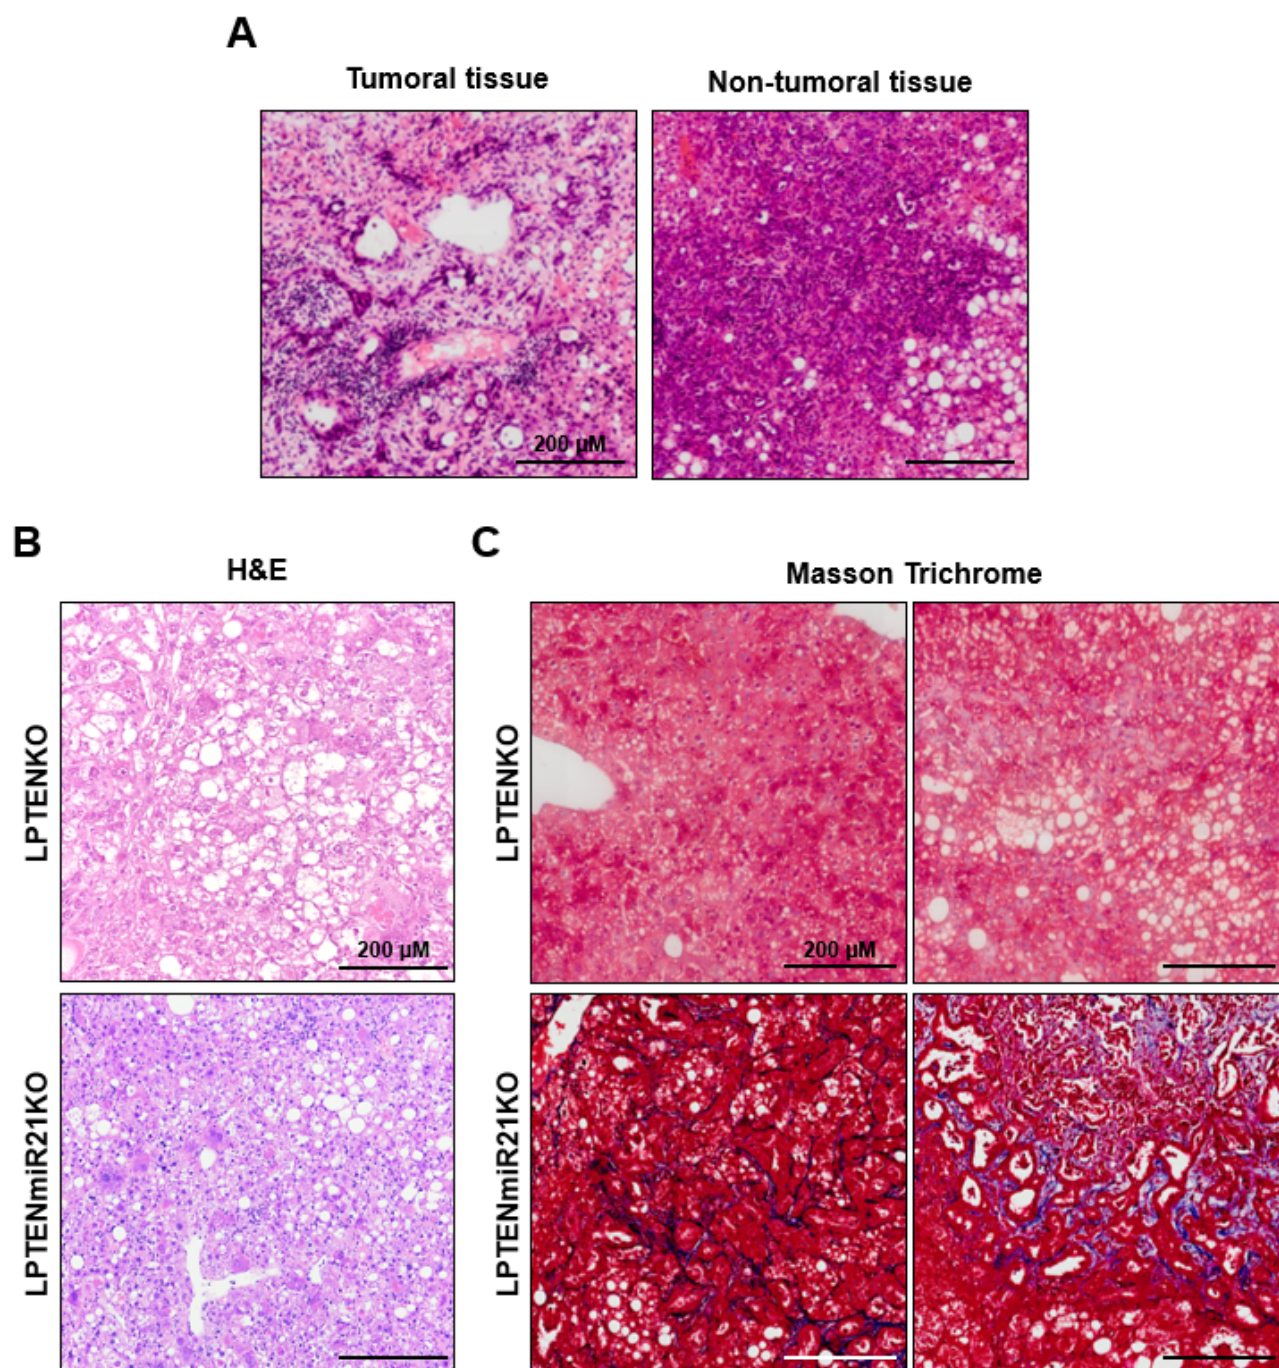

**Figure S5. Hepatocyte-specific deletion of miR-21 in LPTENKO mice promotes inflammation and fibrosis.** (A) Severe immune infiltration (dark and dense nuclei typical from immune cells) was observed in the livers of LPTENmiR21KO mice, not only in non-tumoral tissue (left) but also surrounding tumoral masses (right) (12 months old mice). (B) Analysis of hematoxylin-eosin (H&E) stained sections of livers from LPTENKO and from LPTENmiR21KO mice revealed the occurrence of steatohepatitis in both models, with an exacerbation of the phenotype on the latter. (C) Fibrosis was observed in LPTENmiR21KO mice but not in LPTENKO, and mainly in the center of tumoral masses of mixed origin - Masson-trichrome staining, magnification X40. Evaluation of steatosis, inflammation and fibrosis was performed by an expert liver pathologist (Prof. Christine Sempoux, Institute of Pathology, Lausanne University Hospital, University of Lausanne, Lausanne, Switzerland).

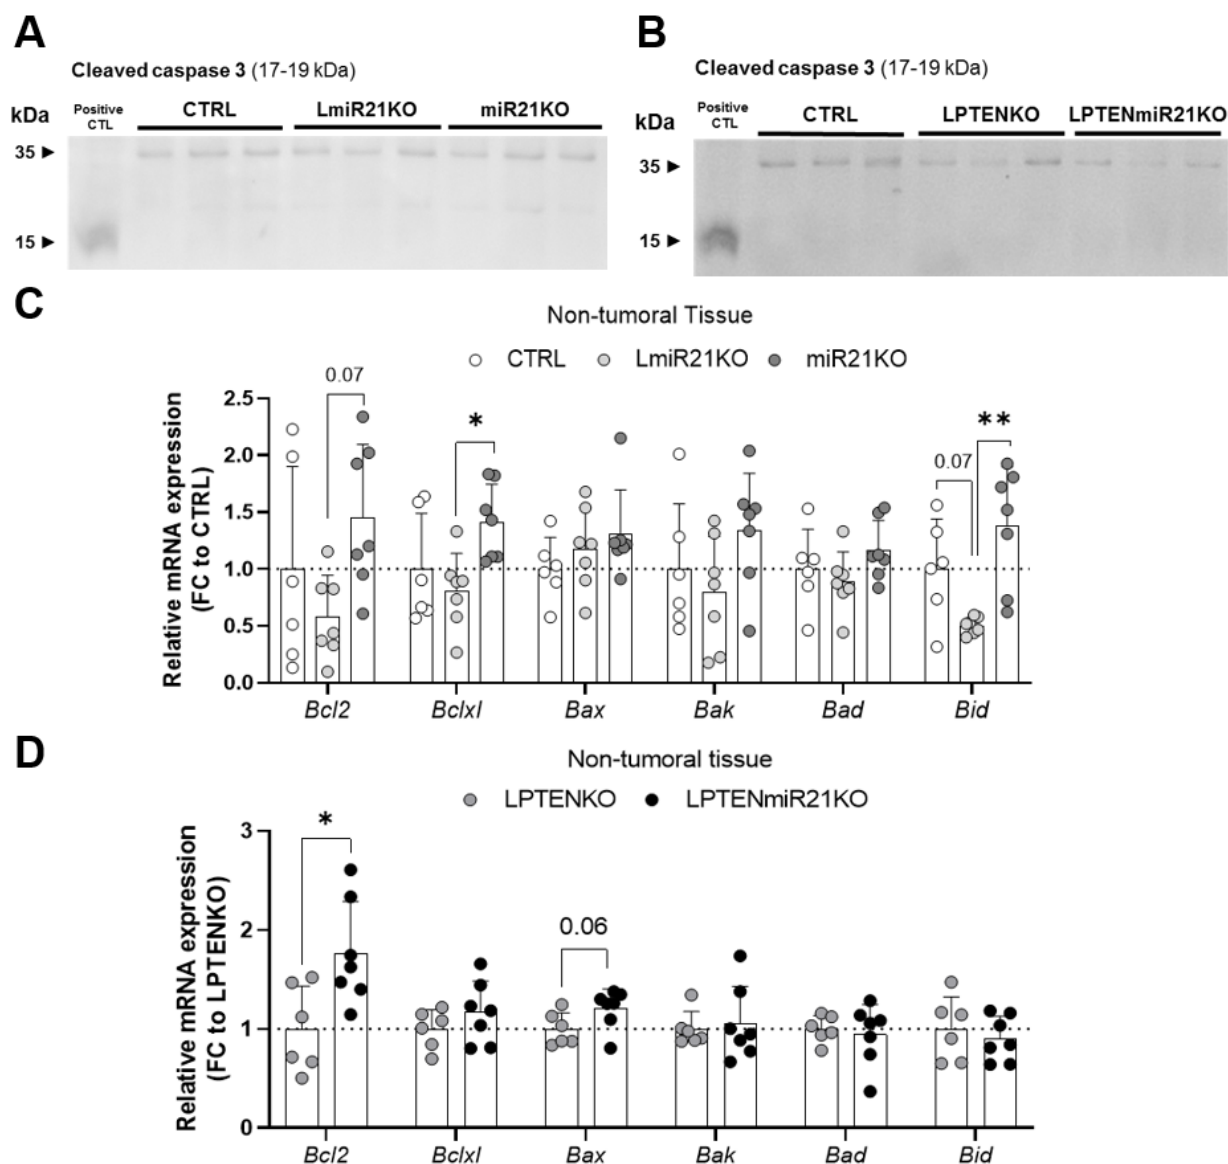

**Figure S6. Apoptosis in mouse hepatic tissues is not affected by miR-21 deficiency.** Western blot analysis of cleaved caspase 3 in the liver tissues of (A) DEN-treated 11 months-old control (CTRL, n=6), hepatocyte-specific (LmiR21KO, n=6) and total miR-21 (miR21KO, n=8) knockout mice, and (B) 12 months-old wild-type (CTRL, n=5), hepatocyte-specific PTEN knockout (LPTENKO, n=6) and hepatocyte-specific PTEN-miR21 knockout (LPTENmiR21KO, n=8) mice. HepG2 cells treated with staurosporin (1  $\mu$ mol for 48 hours) were used as positive control for apoptosis (first lane). RT-qPCR analysis of apoptosis-related markers (*Bcl2*, *Bclxl*, *Bax*, *Bak*, *Bad*, *Bid*) in the livers of (C) DEN-treated 11 months-old control (CTRL, n=6), hepatocyte-specific (LmiR21KO, n=7) and total miR-21 (miR21KO, n=7) knockout mice, and (D) 12 months-old hepatocyte-specific PTEN knockout (LPTENKO, n=6) and hepatocyte-specific PTEN-miR21 knockout (LPTENmiR21KO, n=7) mice. Data from DEN-treated LmiR21KO and miR-21KO mice are represented as mean  $\pm$  SD fold-change (FC) to DEN treated CTRL mice. Data of LPTENmiR21KO mice is represented as mean  $\pm$  SD fold-change (FC) to LPTENKO. Data that failed normality tests was submitted to log10-transformation prior to statistical analysis. Outliers test was performed using ROUT method (Q=1%). Unpaired t-test with Welch's correction was used for comparison between two groups. One-way ANOVA with Holm-Sidak's correction was used for comparison between more than two groups. \* p-value < 0.05, \*\* p-value < 0.01, \*\*\* p-value < 0.001, \*\*\*\* p-value < 0.0001.



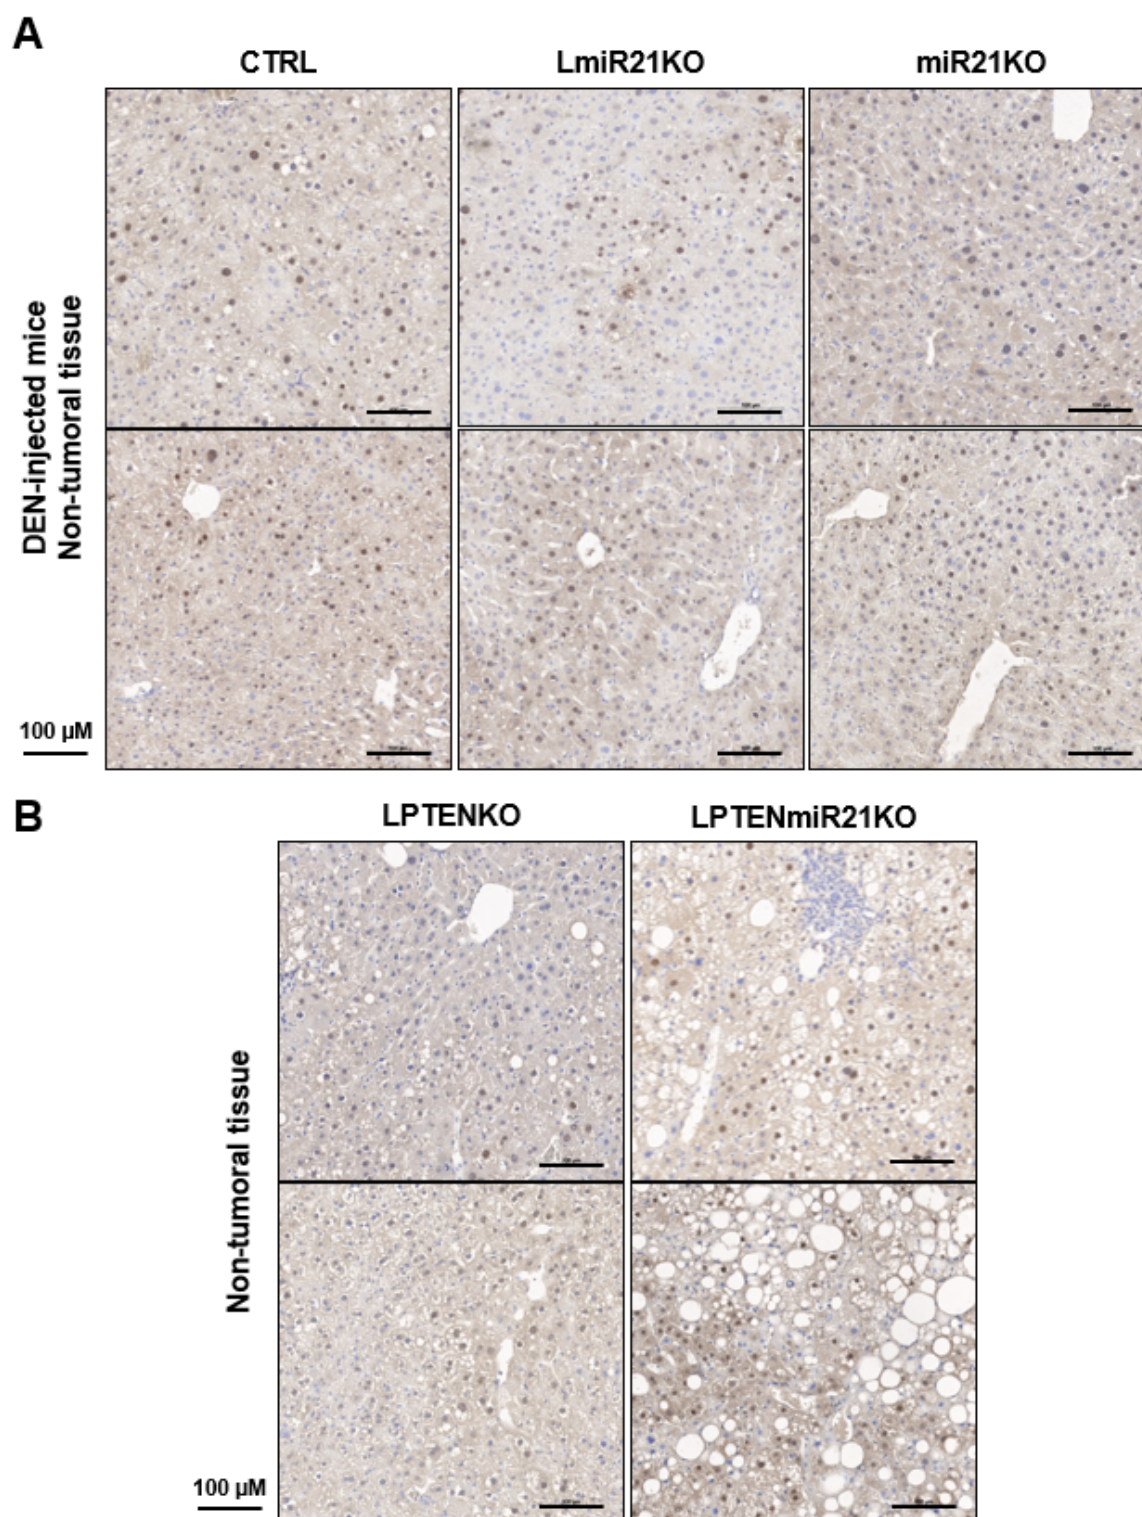

**Figure S7.** Ki67 immunohistological staining of liver sections from controls and miR-21 deficient mice. Representative immunohistochemical staining of the Ki67 proliferation marker in liver sections of 11 months-old DEN-treated mice (CTRL, LmiR21KO and miR21KO mice) and **(B)** 12 months-old LPTENKO and LPTENmiR21KO mice.

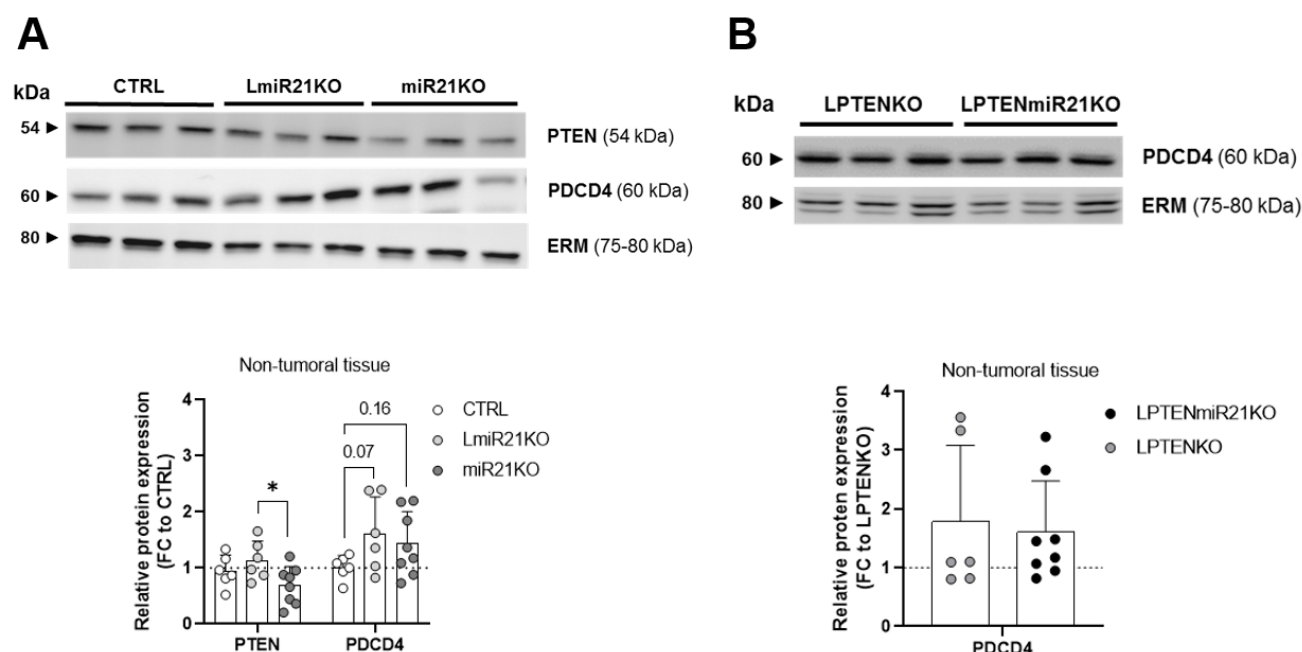

**Figure S8. miR-21 deficiency does not affect the expression of PTEN and PDCD4 in hepatic tissues.** (A) Representative Western blot (top panel, 3 mice per group) and quantifications (bottom panel) of PTEN and PDCD4 in the hepatic tissues of 11 months-old control, hepatocyte-specific and total miR-21 knockout mice injected with DEN. Quantifications were performed on Western blot analysis of n=6 CTRL mice, n=6 LmiR21KO and n=8 miR21KO. Data from DEN-injected miR-21 KO mice is represented as mean  $\pm$  SD fold-change to DEN-treated CTRL mice. (B) Representative Western blot (top panel, 3 mice per group) and quantifications (bottom panel) of PDCD4 in the hepatic tissues of 12 months-old hepatocyte-specific PTEN and PTEN-miR21 knockout mice. Quantifications were performed on Western blot analysis of n=5 LPTENKO and n=8 LPTENmiR21KO. Data of LPTENKO and LPTENmiR21KO mice is represented as mean  $\pm$  SD FC to LPTENKO. Data that failed normality tests was submitted to log10-transformation prior to statistical analysis. Outliers test was performed using ROUT method (Q=1%). Unpaired t-test with Welch's correction was used for comparison between two groups. One-way ANOVA with Holm-Sidak's correction was used for comparison between more than two groups. \* p-value < 0.05, \*\* p-value < 0.01, \*\*\* p-value < 0.001, \*\*\*\* p-value < 0.0001.

**A**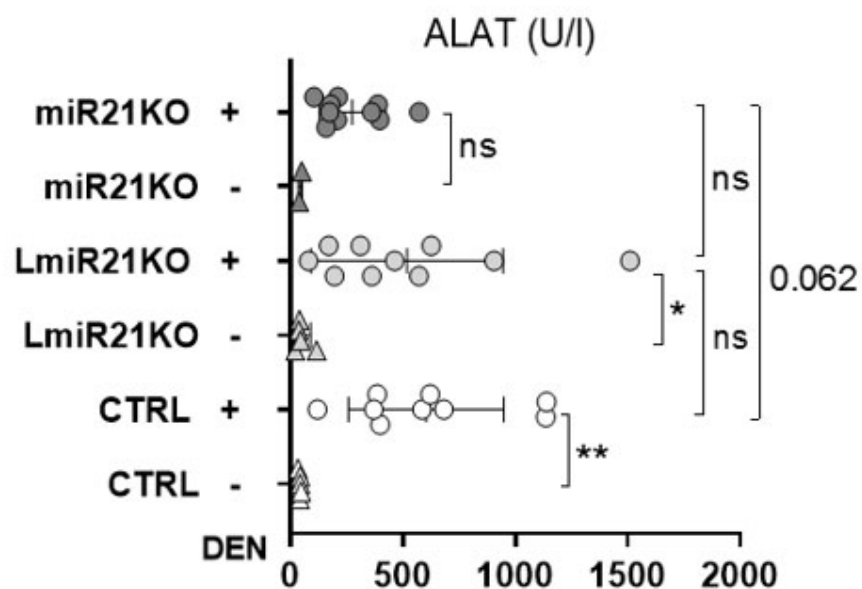**B**

### Markers of immune cell recruitment/adhesion & activation/differentiation

48h post DEN injection

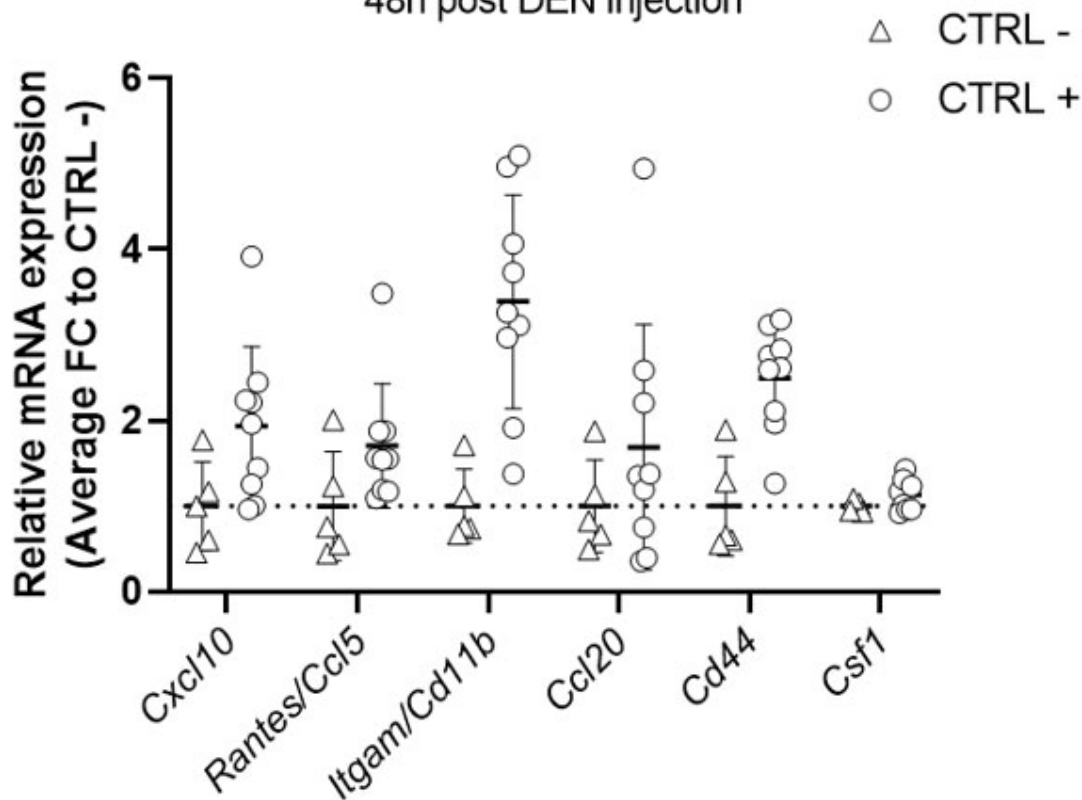



**Figure S9. DEN exposure leads to acute liver injury, inflammation and immune cell recruitment in mice.** (A) Plasma alanine-aminotransferase (ALAT) levels in 2 months-old mice 48h post-diethylnitrosamine injection (DEN, 100 mg/kg of body weight i.p.) or with NaCl from CTRL (DEN + n=9, DEN - n=5), LmiR21KO (DEN + n=10, DEN - n=5) and miR21KO (DEN + n=10, DEN - n=2) groups. Data is represented as mean  $\pm$  SD and outliers test was performed using ROUT method (Q=1%). (B) Relative mRNA expression of inflammatory markers involved in immune cell recruitment, adhesion, activation and differentiation in hepatic tissues of 2 months-old mice 48h post-DEN injection (100 mg/kg of body weight, CTRL: DEN + n=9, DEN - n=5). Data from DEN-injected miR-21 KO mice is represented as mean  $\pm$  SD fold-change to CTRL mice (DEN -, NaCl injected). One-way ANOVA with Holm-Sidak's correction was used for comparison between more than two groups. \* p-value <0.05, \*\* p-value <0.01, \*\*\* p-value <0.001, \*\*\*\* p-value <0.0001.

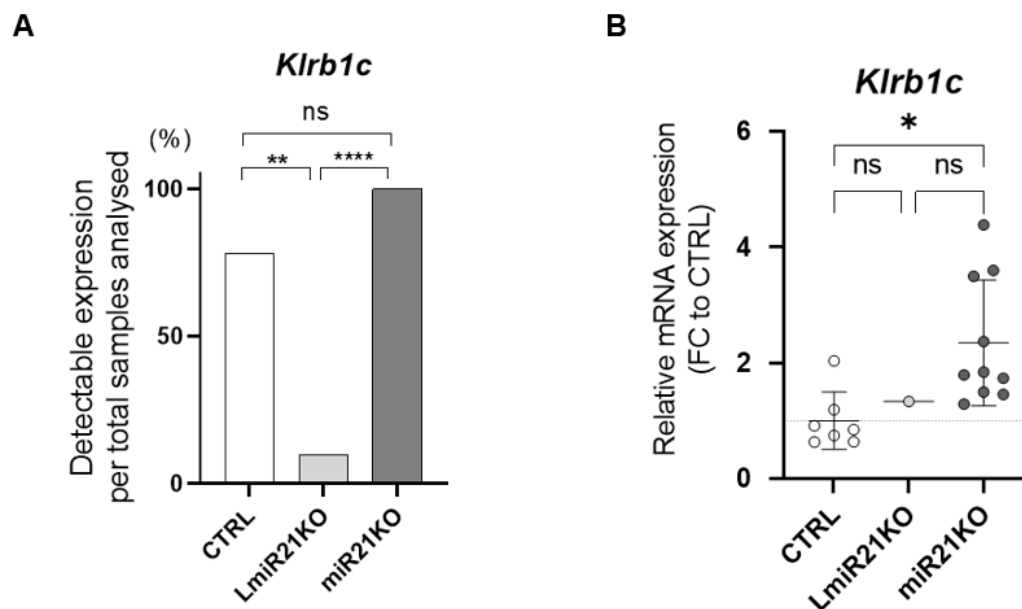

**Figure S10. Hepatocyte-specific or total miR-21 deletion impacts NK cells activity in response to DEN exposure** (A) Detectable expression of the *Klr1c* marker of Natural Killer (NK) cells cytotoxicity activity in hepatic tissues of 2 months-old mice 48h post-DEN injection. Data is represented as percentage of samples with detectable expression *versus* total number of analysed samples (CTRL n=9, LmiR21KO n=10, miR21KO n=10). (B) Relative mRNA expression of *Klr1c* gene in hepatic tissues of 2 months-old mice 48h post-DEN injection in samples with detectable levels of *Klr1c* expression. Data from DEN-injected miR-21 KO mice is represented as mean  $\pm$  SD fold-change to CTRL mice (miR21fx treated with DEN). Chi-Square Test was used to evaluate the independence of categorical variables (percentage of samples with detected expression). One-way ANOVA with Holm-Sidak's correction was used for comparison between more than two groups. \* p-value <0.05, \*\* p-value <0.01, \*\*\* p-value <0.001, \*\*\*\* p-value <0.0001.

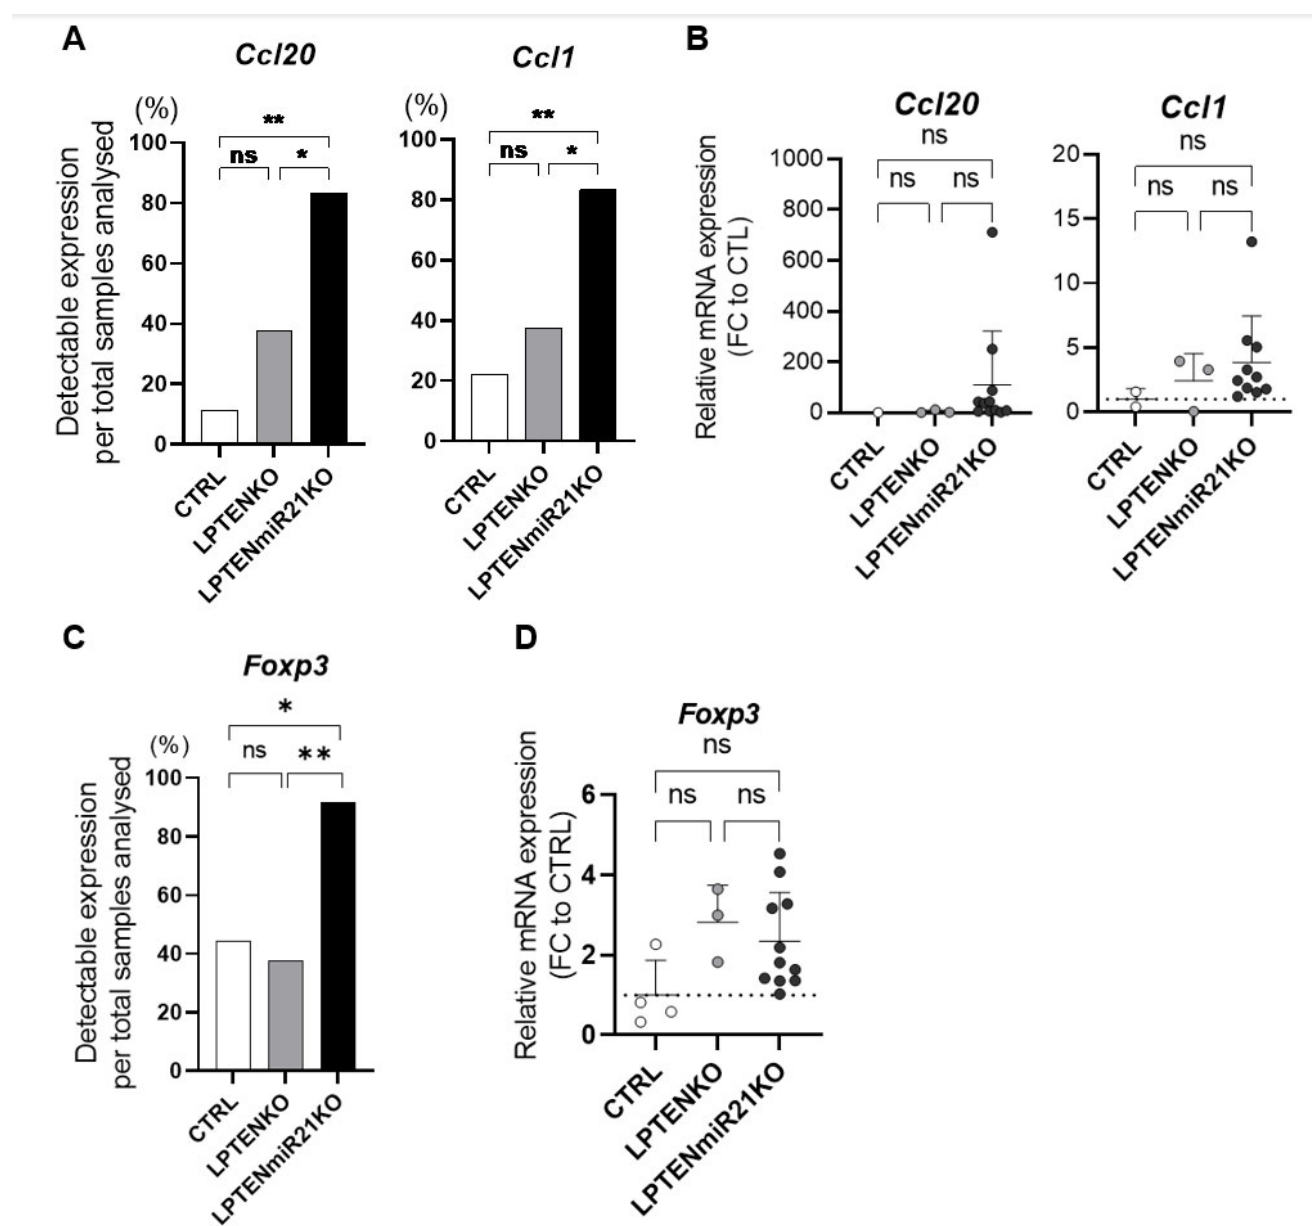

**Figure S11.** Loss of miR-21 in PTEN knockout hepatocytes fosters a pro-inflammatory environment and the infiltration of regulatory T cells (T reg). (A) Percentage of samples from 7 months-old mice with detectable expression by RT-qPCR of *Ccl20* and *Ccl1* markers of immune cell recruitment. (B) *Ccl20* and *Ccl1* relative mRNA expression in 7 months-old mice. (C) Percentage of samples from 7 months-old mice with detectable expression by RT-qPCR of *Foxp3* a marker of regulatory T cells. (D) *Foxp3* relative mRNA expression in 7 months-old mice. Analysis were performed on hepatic tissues of 7 months-old mice (CTRL: n=9, LPTENKO: n=8; LPTENmiR21KO mice: n=12). Detectable expression data is represented as percentage of samples with detected expression versus total number of analysed samples. Relative mRNA expression is represented as mean  $\pm$  SD of the fold-change to CTRL mice. Chi-Square Test was used to evaluate the independence of categorical variables (percentage of samples with detected expression). P-value is indicated in the graphs. One-way ANOVA with Holm-Sidak's correction was used for comparison between more than two groups.

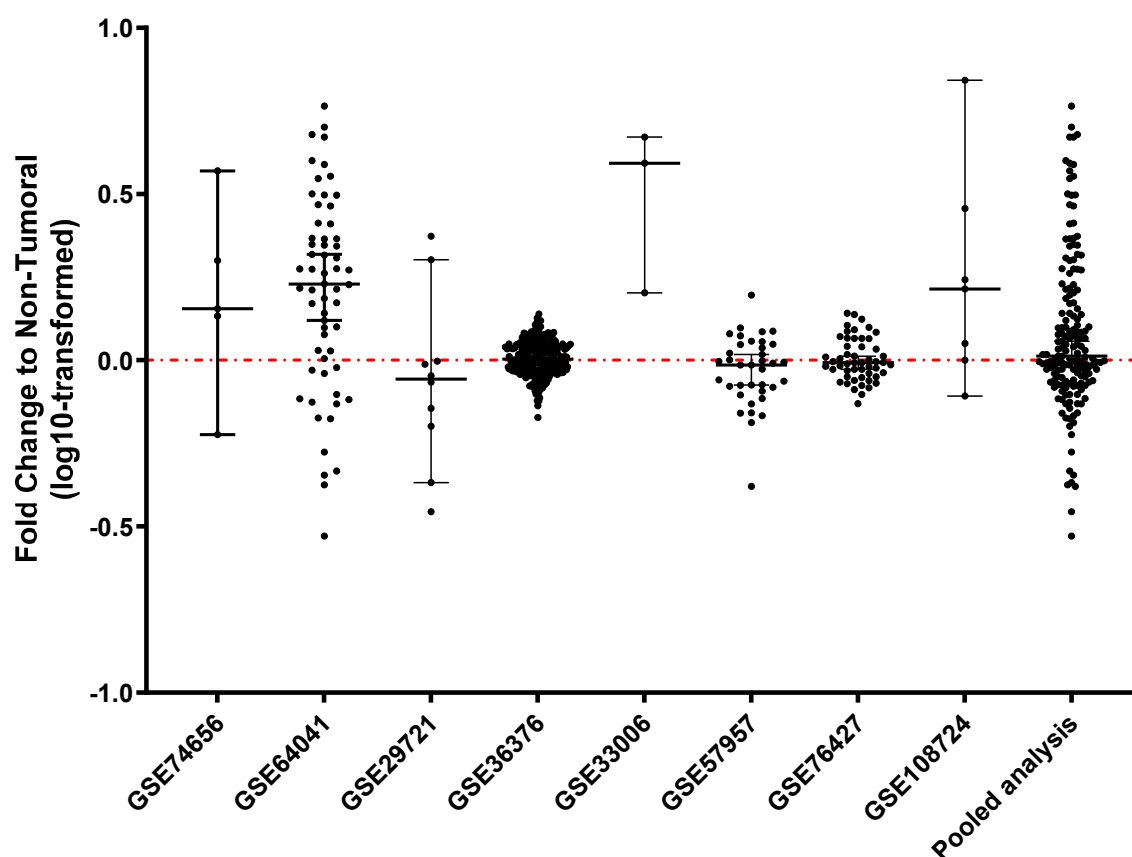

**Figure S12.** MiR-21 expression in human HCC samples *versus* non-tumoral liver tissue. The graph represents fold change of miR-21 expression in human hepatocellular carcinoma biopsies as reported to the associated non-tumoral hepatic tissue of the donor. Data were obtained from 8 different GEO datasets (GSE74656, GSE64041, GSE29721, GSE36376, GSE33006, GSE57957, GSE76427, GSE108724). The last column represents a pooled analysis of all of the samples analysed from the 8 GEO datasets. Fold change is represented as mean  $\pm$  SD for each GEO dataset.

**Table S1.** List of Primers used and respective sequences

| Gene               | Forward (5' → 3')         | Reverse (5' → 3')          | Species |
|--------------------|---------------------------|----------------------------|---------|
| <i>App1</i>        | AGCCAGTGACCTTTATATCTGC    | AGGTATCCAGCCTTTCGGGT       | Mouse   |
| <i>Arg1</i>        | ATGGGCAACCTGTGTCTTT       | TCTACGTCTCGCAAGCCAAT       | Mouse   |
| <i>Bad</i>         | GGAAGACGCTAGTGCTACAGA     | GAGCCTCCTTTGCCAAGTTT       | Mouse   |
| <i>Bak</i>         | CCCAGGACACAGAGGAGGTC      | GCCCAACAGAACCACACCAAAA     | Mouse   |
| <i>Bax</i>         | CGGCGAATTGGAGATGAAGT      | GCAAAGTAGAAGAGGGCAACC      | Mouse   |
| <i>Bcl2</i>        | TACCGTCTGTGACTTCGACAG     | GGCAGGCTGAGCAGGGTCTT       | Mouse   |
| <i>Bclxl</i>       | AGGCAGGCGATGAGTTTGAAC     | GAACCACACAGCCACAGTCA       | Mouse   |
| <i>Bid</i>         | GCCAAGCACATCACAGACCTG     | GAAGACATCACGGAGCAAAGAT     | Mouse   |
| <i>Camkk2</i>      | TCATGTGTCTTAGCCAGCC       | TGACCACGATGAAGGATTCCAT     | Mouse   |
| <i>Ccl1</i>        | GGCTGCCGTGTGGATACAG       | AGGTGATTTTGAACCCACGTTT     | Mouse   |
| <i>Ccl20</i>       | ACTGTTGCCCTCTCGTACATACA   | GAGGAGGTTTACAGCCCTTTT      | Mouse   |
| <i>Ccl22</i>       | CTTGCTGTGGCAATTCAGACC     | CTTGCTGTGGCAATTCAGACC      | Mouse   |
| <i>Ccnb1</i>       | AAGGTGCCTGTGTGAACC        | GTGAGCCCATCATCTGCG         | Mouse   |
| <i>Ccnd1</i>       | TGACTGCCGAGAAGTTGTGC      | CTCATCCGCTCTGGCATT         | Mouse   |
| <i>Cd11c</i>       | GACGTATCTTTACAAGCTGGTTTCT | CCGTCTGAGACAACTGTCCATT     | Mouse   |
| <i>Cd14</i>        | CTCTGTCTTAAAGCGGCTTAC     | GTTGCGGAGGTTCAAGATGTT      | Mouse   |
| <i>Cd163</i>       | ATGGGTGGACACAGAATGGTT     | CAGGAGCGTTAGTGACAGCAG      | Mouse   |
| <i>Cd19</i>        | AGTGATTGTCAATGTCTCAGACC   | CTCCCCACTATCCTCCACGTT      | Mouse   |
| <i>Cd335</i>       | ATGCTGCCAACACTCACTG       | GATGTTCAACGAGTTTCCATTG     | Mouse   |
| <i>Cd38</i>        | TCTCTAGGAAAGCCAGATCG      | GTCCACACCAGGAGTGAGC        | Mouse   |
| <i>Cd3e</i>        | ATGCGGTGGAACACTTTCTGG     | GCACGTCAACTCTACACTGGT      | Mouse   |
| <i>Cd4</i>         | TCCTAGCTGTCACTCAAGGGA     | TCAGAGAACTCCAGGTGAAGA      | Mouse   |
| <i>Cd44</i>        | ACTTTGCCCTTTCAGTTGAG      | TTTCTCCCATGGAATACACCTG     | Mouse   |
| <i>Cd80</i>        | TGCTGCTGATTCGCTTTTAC      | GAGGAGAGTTGTAAACGGCAAG     | Mouse   |
| <i>Cd8a</i>        | AAGAAAATGGACGCGAAGCTT     | AAGCCATATAGACAACGAAGGTG    | Mouse   |
| <i>Cdc25a</i>      | ACAGCAGTCTACAGAGAATGGG    | GATGAGGTGAAAGGTGTCTTGG     | Mouse   |
| <i>CDC25A</i>      | GTGAAGGCGCTATTTGGCG       | TGGTTGCTCATATCACTGCC       | Human   |
| <i>Cdk1</i>        | GTCCGTCTGAACCTGTTGAG      | TGACTATATTTGGATGTCGAAG     | Mouse   |
| <i>Col4a1</i>      | TCCGGGAGAGATTGGTTTCC      | CTGGCCTATAAGCCCTGGT        | Mouse   |
| <i>Cpd</i>         | CTGAGGCGACACGACAAC        | CTGCCGATGCTGAAGAGAC        | Mouse   |
| <i>Csf1</i>        | ATGGACACCTGAAGTCTCTG      | GTTAGCATTGGGGGTGTTGT       | Mouse   |
| <i>Cxcl10</i>      | CCAAGTGCTGCCGTCAATTTT     | GGCTCGCAGGGATGATTTCAA      | Mouse   |
| <i>Cxcl9</i>       | TCCTTTTGGGCATCATCTTCC     | TTTGTAGTGGATCGTGCCTCG      | Mouse   |
| <i>Egfr</i>        | GCCATCTGGGCCAAAGATACC     | GTCTTCGCATGAATAGGCCAAT     | Mouse   |
| <i>Egr2</i>        | GCCAAGGCCGTAGACAAAATC     | CCACTCCGTTTCACTGTGTC       | Mouse   |
| <i>Fasl</i>        | TCCGTGAGTTTACCAACCAAAA    | GGGGGTTCCCTGTTAAATGGG      | Mouse   |
| <i>Foxp3</i>       | CCCATCCCCAGGAGTCTTG       | ACCATGACTAGGGGCACTGTA      | Mouse   |
| <i>Fpr2</i>        | TTACACCACAGGAACGAAGA      | CAGCACACCAAGGAAGAAAGTG     | Mouse   |
| <i>Gak</i>         | CTGCCACACAGGCATTG         | CCATGTACATACATATTCATGTACCT | Mouse   |
| <i>Gpr18</i>       | TCGAGCTCAGCAGACCAAC       | TGGTATGTAGAACCCTCTGTCTG    | Mouse   |
| <i>Havcr2 Tim3</i> | TCAGGTCTTACCCTCAACTGTG    | GGGCAGATAGGCATTTTACCA      | Mouse   |
| <i>Hbp1</i>        | TGGCTTGCTCACTGTAGAGTGC    | CAGGAGGTAGACATACGTCACC     | Mouse   |
| <i>Hpgd</i>        | CAACAATGCAGGCGTGAACA      | GCGTGTGAATCCGATGATGC       | Mouse   |
| <i>Ifng</i>        | ACAATGAACGCTACACACTGCAT   | TGGCAGTAACAGCCAGAAACA      | Mouse   |
| <i>Il10</i>        | CTTTCAAACAAAGGACCAGC      | CCAAGTAACCTTTAAAGTCCT      | Mouse   |
| <i>Il17a</i>       | TTTAACTCCCTTGGCGCAAAA     | CTTTCCCTCCGATTGACAC        | Mouse   |
| <i>Il1b</i>        | GACAACTGCACTACAGGC        | CATGGAGAATATCACTTGTGG      | Mouse   |
| <i>Il6</i>         | AGTTGCCTTCTTGGGACTGAT     | TCCACGATTTCCAGAGAAC        | Mouse   |
| <i>Il6st</i>       | CTTGCAATTGTGAATGAGGGGA    | TGGGCATGTAGCTGACCATAC      | Mouse   |
| <i>Itgam</i>       | ATGGACGCTGATGGCAATACC     | TCCCCATTACGCTCTCCA         | Mouse   |
| <i>Ki67</i>        | TGGTCACCATCAAGCGGAG       | AGGCAGCTGGATACGAATGT       | Mouse   |
| <i>Klr1c</i>       | GACACAGCAAGTATCTACCTCGG   | TCAGAGCCAACCTGTGTGAACG     | Mouse   |
| <i>Marveld2</i>    | ACCCGTCGTTGTCTCATCGAAA    | TCACGATAGGCTTCGGAATGT      | Mouse   |
| <i>Mtor</i>        | CAGTTCCGCAAGTGGACTGAAG    | GCTGGTCTAGAGAAGCGAGTAGAC   | Mouse   |
| <i>Nek6</i>        | ACATGCCTCATGGAGGGAG       | GCCAGTGAGCAGCGAAAAG        | Mouse   |
| <i>P21</i>         | ACAAGAGGCCAGTACTTCC       | AGAAATCTGTCAAGCTGGTCT      | Mouse   |
| <i>P27</i>         | CGAGTTCTACTACAGGCCCC      | GACGAGTCAGGCATTTGGTC       | Mouse   |
| <i>Pcna</i>        | CCTGTGCAAGAATGGGGTG       | TCTCTATGGTTACCGCTCC        | Mouse   |
| <i>Pdcd4</i>       | CGGTAGAAGTGGAGTTGC        | ACAGTTCTCCTGGTCGTC         | Mouse   |
| <i>PPIA</i>        | ATGGTCAACCCACCGTGT        | TCTGTGTCTTTGGACCTGTGTC     | Human   |
| <i>Ppia</i>        | CAATGCTGGACCAACACAA       | GCCATCCAGCCATTCACTCT       | Mouse   |

| Gene               | Forward (5' --> 3')      | Reverse (5' --> 3')                                       | Species            |
|--------------------|--------------------------|-----------------------------------------------------------|--------------------|
| <i>Per2</i>        | GAAAGCTGTCACCACCATAGAA   | AACCTCGCACTTCCTTTTCAGG                                    | Mouse              |
| <i>Ppara</i>       | ACGATGCTGTCTCCTTGATG     | GTGTGATAAAGCCATTGCCGT                                     | Mouse              |
| <i>Pten</i>        | ACACCGCCAAATTTAACTGC     | TACACCAGTCCGTCCCTTTTC                                     | Mouse              |
| <i>Rantes/Ccl5</i> | CTCACCATATGGCTCGGA       | TTCCTTCGAGTGACAAACAC                                      | Mouse              |
| <i>Rps9</i>        | GACCAGGAGCTAAAGTTGATTGGA | TCTTGGCCAGGGTAAACTTGA                                     | Mouse              |
| <i>Selp</i>        | CATCTGGTTCAGTGCTTTGATCT  | ACCCGTGAGTTATTCCATGAGT                                    | Mouse              |
| <i>Sftpa1</i>      | GAGGAGCTTCAGACTGCACTC    | AGACTTTATCCCCCACTGACAG                                    | Mouse              |
| <i>Spry2</i>       | TGAAAGACTCCACGGTCTGC     | AGCTGACAGTGCTGATGGAC                                      | Mouse              |
| <i>Srp72</i>       | CACCCAGCAGACAGACAACTG    | GCACTCATCGTAGCGTTCCA                                      | Mouse              |
| <i>Tgfb</i>        | CAACATGTGGAACCTTACCAG    | TGTATTCCGTCTCCTTGGT                                       | Mouse              |
| <i>Timp3</i>       | ACACGGAAGCCTCTGAAAGT     | TCATACACGCGCCCTGTCA                                       | Mouse              |
| <i>Tnfa</i>        | GGCTGCCCGACTACGT         | GACTTTCTCCTGGTATGAGATAGCAA                                | Mouse              |
| <i>miR-21</i>      | CGCTAGCTTATCAGACTGATG    | GAGGTATTTCGCACCAGAGGA<br>(universal miRNA reverse primer) | Human and<br>Mouse |
| <i>miR-122</i>     | GGCTGTGGAGTGTGACAATG     | GAGGTATTTCGCACCAGAGGA<br>(universal miRNA reverse primer) | Human and<br>Mouse |
| <i>miR-16</i>      | ACAGCCTAGCAGCACGTAAAT    | GAGGTATTTCGCACCAGAGGA<br>(universal miRNA reverse primer) | Human and<br>Mouse |

Table S2. – List of antibodies used for Western blot analysis and immunohistochemistry.

| Protein                     | Antibody production (Catalog no.) | Dilution     |
|-----------------------------|-----------------------------------|--------------|
| Ki67                        | Millipore (AB9260)                | 1:150 (IHC)  |
| Phospho-ERK1/2              | Cell signalling (#9101)           | 1:1000 (WB)  |
| ERK 1/2                     | Cell signalling (#9102)           | 1:1000 (WB)  |
| Phospho-P38 (Thr180/Tyr182) | Cell signalling (#4511)           | 1:1000 (WB)  |
| P38                         | Cell signalling (#8690)           | 1:1000 (WB)  |
| Phospho-JNK                 | Cell signalling (#9251)           | 1:1000 (WB)  |
| JNK                         | Cell signalling (#9252)           | 1:1000 (WB)  |
| Phospho-STAT3               | Cell signalling (#9145)           | 1:1000 (WB)  |
| STAT3                       | Cell signalling (#12640)          | 1:1000 (WB)  |
| Phospho-AKT (Ser473)        | Cell signalling (#9271)           | 1:1000 (WB)  |
| AKT                         | Cell signalling (#9272)           | 1:1000 (WB)  |
| Phospho-YAP (Ser127)        | Cell signalling (#13008)          | 1:1000 (WB)  |
| YAP                         | Cell signalling (#14074)          | 1:1000 (WB)  |
| ERM                         | Cell signalling (#3142)           | 1:1000 (WB)  |
| PTEN                        | Cell signalling (#9559)           | 1:1000 (WB)  |
| PDCD4                       | Cell signalling (#9535)           | 1:1000 (WB)  |
| Cleaved Caspase 3           | Cell signalling (#9661)           | 1:1000 (WB)  |
| Goat Anti-rabbit IgG-HRP    | BioRad (#1706515)                 | 1:10000 (WB) |

**Supplementary Table 3.** List of potential miR-21 target genes deregulated in the transcriptomic analysis performed on hepatic tissues from hepatocyte-specific miR-21 knockout (LmiR21KO) challenged with high-fat diet for 3 weeks. Genes deregulated in the transcriptomic analysis performed on hepatic tissues of LmiR21KO (Figure 1) were classified as oncogenes (ONC, in black), tumor suppressors (TS, in blue) or drivers (D, in green) based on literature screening (source: CancerMine database). Non-classified genes (NC, in grey) and genes with double functions (marked with \*) are also indicated. Genes up- or downregulated in LmiR21KO mice are indicated with red upward or grey downward arrows, respectively.

**Table S3.** – Classification of 124 genes of interest as ONC, D or TS (1/4).

| Genes deregulated in LmiR21KO<br>targeted by miR-21<br>(predicted and validated) | Genes classified as<br>Sources: CancerMine | Expression in LmiR-21KO<br>transcriptomic (p-value<0.05) |
|----------------------------------------------------------------------------------|--------------------------------------------|----------------------------------------------------------|
| AACS                                                                             | NC                                         | ↓                                                        |
| ABCA2                                                                            | NC                                         | ↑                                                        |
| ABCB1                                                                            | NC                                         | ↑                                                        |
| ABCC3                                                                            | TS                                         | ↓                                                        |
| ACP3                                                                             | NC                                         | ↑                                                        |
| ADAMTS9                                                                          | TS                                         | ↓                                                        |
| ADH1                                                                             | NC                                         | ↓                                                        |
| ALB                                                                              | D                                          | ↓                                                        |
| ANGPTL4                                                                          | TS                                         | ↓                                                        |
| APPL1                                                                            | NC                                         | ↑                                                        |
| AR                                                                               | D                                          | ↑                                                        |
| ARAP2                                                                            | NC                                         | ↑                                                        |
| ARHGEF10L                                                                        | NC                                         | ↑                                                        |
| ATF5                                                                             | ONC                                        | ↑                                                        |
| ATP10D                                                                           | NC                                         | ↓                                                        |
| ATP7B                                                                            | ONC                                        | ↑                                                        |
| BCL2L1                                                                           | ONC                                        | ↓                                                        |
| BDNF                                                                             | ONC                                        | ↓                                                        |
| BIRC5                                                                            | ONC                                        | ↓                                                        |
| BMP7                                                                             | ONC                                        | ↓                                                        |
| BRI3                                                                             | NC                                         | ↓                                                        |
| C6                                                                               | NC                                         | ↑                                                        |
| C8A                                                                              | NC                                         | ↑                                                        |
| CAMKK2                                                                           | D                                          | ↑                                                        |
| CCND1                                                                            | ONC                                        | ↑                                                        |
| CD36                                                                             | D                                          | ↓                                                        |
| CD47*                                                                            | D/ONC                                      | ↓                                                        |
| CD5L                                                                             | NC                                         | ↑                                                        |
| CDC25A                                                                           | ONC                                        | ↑                                                        |
| CDH1*                                                                            | ONC/TS                                     | ↓                                                        |
| CES2A                                                                            | NC                                         | ↓                                                        |
| CFHR1/2                                                                          | NC                                         | ↓                                                        |
| CHORDC1                                                                          | D                                          | ↓                                                        |
| CISH                                                                             | ONC                                        | ↓                                                        |
| COL12A1                                                                          | ONC                                        | ↑                                                        |
| COL15A1                                                                          | NC                                         | ↑                                                        |
| COL4A1                                                                           | NC                                         | ↑                                                        |



**Table S3.** – Classification of 124 genes of interest as ONC, D or TS (2/4).

| <b>Genes deregulated in LmiR21KO<br/>targeted by miR-21<br/>(predicted and validated)</b> | <b>Genes classified as<br/>Sources: CancerMine</b> | <b>Expression in LmiR-21KO<br/>transcriptomic (p-value&lt;0.05)</b> |
|-------------------------------------------------------------------------------------------|----------------------------------------------------|---------------------------------------------------------------------|
| COL4A2                                                                                    | NC                                                 | ↑                                                                   |
| COMT                                                                                      | ONC                                                | ↑                                                                   |
| CPD                                                                                       | D                                                  | ↑                                                                   |
| CXCL10                                                                                    | D                                                  | ↑                                                                   |
| CXCL14                                                                                    | TS                                                 | ↑                                                                   |
| CXCL9                                                                                     | NC                                                 | ↑                                                                   |
| CYP17A1                                                                                   | NC                                                 | ↑                                                                   |
| CYP2D34                                                                                   | NC                                                 | ↓                                                                   |
| CYP2E1                                                                                    | NC                                                 | ↓                                                                   |
| CYP7A1                                                                                    | NC                                                 | ↓                                                                   |
| DACT2                                                                                     | TS                                                 | ↑                                                                   |
| DAGLA                                                                                     | TS                                                 | ↑                                                                   |
| DDX60                                                                                     | NC                                                 | ↑                                                                   |
| DNMT3B*                                                                                   | ONC/TS                                             | ↑                                                                   |
| DUSP1*                                                                                    | ONC/TS                                             | ↓                                                                   |
| EFNA1                                                                                     | NC                                                 | ↑                                                                   |
| EGFR                                                                                      | ONC                                                | ↑                                                                   |
| ESR1*                                                                                     | ONC/TS                                             | ↑                                                                   |
| ESRRG                                                                                     | TS                                                 | ↓                                                                   |
| FGB                                                                                       | NC                                                 | ↑                                                                   |
| FGFR2                                                                                     | ONC                                                | ↑                                                                   |
| FOXO1*                                                                                    | ONC/TS                                             | ↓                                                                   |
| FRRS1                                                                                     | NC                                                 | ↑                                                                   |
| FST                                                                                       | ONC                                                | ↑                                                                   |
| FUCA2                                                                                     | NC                                                 | ↑                                                                   |
| FURIN*                                                                                    | D/ONC/TS                                           | ↑                                                                   |
| FZD6                                                                                      | D                                                  | ↑                                                                   |
| GJB2                                                                                      | TS                                                 | ↑                                                                   |
| GRAMD4                                                                                    | NC                                                 | ↑                                                                   |
| GTF3C1                                                                                    | NC                                                 | ↑                                                                   |
| HIPK2                                                                                     | TS                                                 | ↑                                                                   |
| HNF1B                                                                                     | TS                                                 | ↑                                                                   |
| HPGD                                                                                      | TS                                                 | ↓                                                                   |
| HSPA1B*                                                                                   | D/ONC                                              | ↓                                                                   |
| HSPH1                                                                                     | NC                                                 | ↓                                                                   |
| IL22RA1                                                                                   | NC                                                 | ↑                                                                   |
| IL6ST*                                                                                    | TS/ONC                                             | ↑                                                                   |

**Table S3.** – Classification of 124 genes of interest as ONC, D or TS (3/4).

| Genes deregulated in Lmir21KO<br>targeted by miR-21<br>(predicted and validated) | Genes classified as<br>Sources: CancerMine | Expression in Lmir-21KO<br>transcriptomic (p-value<0.05) |
|----------------------------------------------------------------------------------|--------------------------------------------|----------------------------------------------------------|
| IRAK2*                                                                           | ONC/TS                                     | ↑                                                        |
| IRAK4                                                                            | ONC                                        | ↑                                                        |
| IRF5                                                                             | TS                                         | ↑                                                        |
| KRT18*                                                                           | ONC/TS                                     | ↑                                                        |
| LGALS1                                                                           | ONC                                        | ↓                                                        |
| LGR5                                                                             | ONC                                        | ↑                                                        |
| LIFR                                                                             | TS                                         | ↑                                                        |
| LPIN1                                                                            | NC                                         | ↓                                                        |
| MAPKAPK3                                                                         | NC                                         | ↑                                                        |
| MARVELD2                                                                         | ONC                                        | ↑                                                        |
| MGAT5                                                                            | ONC                                        | ↑                                                        |
| MLH1                                                                             | TS                                         | ↑                                                        |
| MME                                                                              | ONC                                        | ↓                                                        |
| MPP1                                                                             | NC                                         | ↓                                                        |
| MTOR                                                                             | ONC                                        | ↑                                                        |
| NEK6                                                                             | ONC                                        | ↑                                                        |
| NGFR                                                                             | TS                                         | ↑                                                        |
| NQO1*                                                                            | ONC/TS                                     | ↓                                                        |
| OAS1A                                                                            | NC                                         | ↑                                                        |
| OCLN                                                                             | NC                                         | ↑                                                        |
| PDCD4*                                                                           | ONC/TS                                     | ↑                                                        |
| PER2                                                                             | TS                                         | ↓                                                        |
| PGLYRP2                                                                          | NC                                         | ↑                                                        |
| PIGP                                                                             | NC                                         | ↓                                                        |
| PML*                                                                             | ONC/TS                                     | ↑                                                        |
| PPP1R1B                                                                          | ONC                                        | ↓                                                        |
| PRKCZ                                                                            | NC                                         | ↑                                                        |
| PXMP2                                                                            | NC                                         | ↓                                                        |
| RASSF5                                                                           | TS                                         | ↑                                                        |
| RFX5                                                                             | NC                                         | ↑                                                        |
| SCAP                                                                             | NC                                         | ↑                                                        |
| SELP                                                                             | NC                                         | ↑                                                        |
| SERPINA1E                                                                        | NC                                         | ↑                                                        |
| SERPINB1A                                                                        | NC                                         | ↓                                                        |
| SERPINE1                                                                         | ONC                                        | ↑                                                        |
| SFTPA1                                                                           | ONC                                        | ↑                                                        |
| SIGLEC1                                                                          | NC                                         | ↑                                                        |

**Table S3.** – Classification of 124 genes of interest as ONC, D or TS (4/4).

| Genes deregulated in LmiR21KO<br>targeted by miR-21<br>(predicted and validated) | Genes classified as<br>Sources: CancerMine | Expression in LmiR-21KO<br>transcriptomic (p-value<0.05) |
|----------------------------------------------------------------------------------|--------------------------------------------|----------------------------------------------------------|
| SLC16A13                                                                         | NC                                         | ↓                                                        |
| SLC16A7                                                                          | ONC                                        | ↓                                                        |
| SLC20A1                                                                          | NC                                         | ↑                                                        |
| SLC37A1                                                                          | NC                                         | ↑                                                        |
| SLC43A2                                                                          | NC                                         | ↑                                                        |
| SQLE                                                                             | ONC                                        | ↑                                                        |
| TAP1                                                                             | NC                                         | ↑                                                        |
| TFF3                                                                             | ONC                                        | ↑                                                        |
| TIRAP                                                                            | NC                                         | ↑                                                        |
| TK1                                                                              | NC                                         | ↓                                                        |
| TLR2                                                                             | ONC                                        | ↑                                                        |
| TNFRSF14                                                                         | TS                                         | ↑                                                        |
| TNFSF10                                                                          | NC                                         | ↑                                                        |
| TNS1                                                                             | ONC                                        | ↓                                                        |

**Table S4.** – Gene Ontology enrichment analysis of genes unclassified by CancerMine

| Functional Category (FDR<0.05)                               | Genes in list                                                                                                           |
|--------------------------------------------------------------|-------------------------------------------------------------------------------------------------------------------------|
| Defense response                                             | OAS1 CXCL9 PGLYRP2 TIRAP SELP FGB C6 PRKCZ CD5L DDX60 IL22RA1 C8A APPL1 TAP1 SERPINA1 SIGLEC1                           |
| Immune response                                              | CXCL9 TIRAP C8A FGB C6 PRKCZ CD5L OAS1 SCAP TNFSF10 DDX60 APPL1 PGLYRP2 TAP1 FUCA2 ACP3 SERPINA1                        |
| Interspecies interaction between organisms                   | SIGLEC1 OAS1 CXCL9 PGLYRP2 TIRAP SELP DDX60 FGB C6 MAPKAPK3 IL22RA1 SLC20A1 C8A APPL1 TAP1 FUCA2                        |
| Pattern recognition receptor signaling pathway               | GRAMD4 MAPKAPK3 TIRAP APPL1 DDX60 FGB                                                                                   |
| Immune effector process                                      | OAS1 C8A C6 PRKCZ CD5L DDX60 CXCL9 APPL1 PGLYRP2 FUCA2 ACP3 SERPINA1                                                    |
| Immune system process                                        | OAS1 CXCL9 TAP1 TIRAP C8A FGB C6 PRKCZ CD5L SCAP TNFSF10 DDX60 APPL1 PGLYRP2 SELP FUCA2 ACP3 SERPINA1                   |
| Response to external biotic stimulus                         | OAS1 CXCL9 PGLYRP2 TIRAP SELP DDX60 FGB C6 MAPKAPK3 IL22RA1 C8A APPL1 FUCA2                                             |
| Response to other organism                                   | OAS1 CXCL9 PGLYRP2 TIRAP SELP DDX60 FGB C6 MAPKAPK3 IL22RA1 C8A APPL1 FUCA2                                             |
| Response to biotic stimulus                                  | OAS1 CXCL9 PGLYRP2 TIRAP SELP DDX60 FGB C6 MAPKAPK3 IL22RA1 C8A APPL1 FUCA2                                             |
| Inflammatory response                                        | CXCL9 PRKCZ CD5L TIRAP APPL1 PGLYRP2 SELP SERPINA1 SIGLEC1                                                              |
| Ceramide translocation                                       | ABCB1 ABCA2                                                                                                             |
| Toll-like receptor signaling pathway                         | GRAMD4 MAPKAPK3 TIRAP APPL1 FGB                                                                                         |
| Positive regulation of response to stimulus                  | SLC20A1 TNFSF10 C8A FGB SELP C6 PRKCZ CD5L APPL1 EFNA1 ACP3 DDX60 TIRAP OCLN MAPKAPK3                                   |
| Response to stress                                           | ARHGEF10L OAS1 CXCL9 PGLYRP2 FGB TIRAP SELP SCAP C6 PRKCZ CD5L DDX60 IL22RA1 C8A APPL1 TAP1 SERPINA1 ABCB1 OCLN SIGLEC1 |
| Humoral immune response                                      | CXCL9 C8A FGB C6 CD5L PGLYRP2                                                                                           |
| Regulation of immune effector process                        | PRKCZ CD5L APPL1 PGLYRP2 DDX60 C6 C8A                                                                                   |
| Defense response to other organism                           | OAS1 PGLYRP2 TIRAP SELP FGB C6 DDX60 CXCL9 IL22RA1 C8A APPL1                                                            |
| Response to bacterium                                        | CXCL9 PGLYRP2 SELP TIRAP FGB MAPKAPK3 IL22RA1 FUCA2                                                                     |
| Sphingolipid translocation                                   | ABCB1 ABCA2                                                                                                             |
| Regulation of response to stimulus                           | SLC20A1 GRAMD4 TNFSF10 TIRAP C8A FGB SELP C6 PRKCZ CD5L APPL1 PGLYRP2 EFNA1 ACP3 ABCB1 DDX60 OCLN ARAP2 MAPKAPK3        |
| Regulation of pattern recognition receptor signaling pathway | GRAMD4 APPL1 DDX60 TIRAP                                                                                                |
| Positive regulation of intracellular signal transduction     | SLC20A1 TNFSF10 FGB SELP PRKCZ EFNA1 DDX60 TIRAP MAPKAPK3                                                               |
| Macropinocytosis                                             | MAPKAPK3 APPL1                                                                                                          |
| Regulation of complement activation                          | CD5L C6 C8A                                                                                                             |
| Defense response to bacterium                                | PGLYRP2 SELP FGB IL22RA1 TIRAP                                                                                          |
| Vesicle-mediated transport                                   | SIGLEC1 ABCA2 FGB CD5L MAPKAPK3 APPL1 SCAP FUCA2 ACP3 TAP1 SELP SERPINA1                                                |
| SREBP signaling pathway                                      | ARHGEF10L SCAP                                                                                                          |
| Phosphate ion transmembrane transport                        | SLC20A1 SLC37A1                                                                                                         |
| Ceramide transport                                           | ABCB1 ABCA2                                                                                                             |
| Cellular response to sterol depletion                        | ARHGEF10L SCAP                                                                                                          |

Genes deregulated in the transcriptomic analysis performed on hepatic tissues of LmiR21KO (Figure 1) were classified as oncogenes, tumor suppressors, drivers and unclassified genes (Table S3) based on literature screening (source: CancerMine database). The list of unclassified genes from Table S3 was taken and Gene Ontology (GO) enrichment analysis based on Biological processes was performed on these genes using ShinyGO software. The enriched functional categories are represented on the left column and the genes involved in the category are indicated on the right column. Only functional categories with False Discovery Rate (FDR) < 5% are represented
